# Supplementary material for: Controls on Greenland moulin geometry and evolution from theMoulin Shape model
Source: Copernicus journal article supplement (doi:10.5194/tc-2021-41), 2021-02-25
Supplement: Supplementary file [file tc-2021-41-AC1-supplement.pdf]

Author response to

## Interactive comment on “Controls on Greenland moulin geometry and evolution from the Moulin Shape model”

Lauren C. Andrews, Kristin Poinar, and Celia Trunz

In review at *The Cryosphere*

July 28, 2021

### Response to Anonymous Referee #1

Authors' responses are inline in blue text.

This paper introduces a new model, MouSh, designed to emulate the seasonal evolution of moulins and examine the impact of this on the basal drainage system. A model like this has been long overdue and it's exciting to see it implemented to investigate both the evolution of the englacial system but also the subglacial system, which may be controlled strongly by moulin capacity and fill and drain rates.

The paper is nicely written and details many aspects of the model which has a lot of components. Looking at the results for the viscous deformation, turbulent melting and the application of Glen's Flow law provides interesting information about the evolution of these features and how they might significantly change radius even on a daily basis, which is not something that I was aware could happen.

I do have some major concerns which I list below but, once these are taken into account, I think this will be a strong addition to glaciological modeling.

Thanks for the encouraging assessment of the worth of the MouSh model and our manuscript. We appreciate the time it takes to complete a thorough review. Our responses to both major and minor comments are below. We note that during the review process, many of the line numbers in the “line-by-line comments” section reverted to an automatic numbering scheme. We did our best to identify the correct lines and respond appropriately, but there are some instances where we were not successful.

### Major issues

1. I'm confused by the implementation of elastic equations in this context. Most applications of elastic equations in glaciology, that I'm familiar with, are for a situation with a bending beam or plate (e.g. ice shelf flexure) in response to a changing force. I have a difficult time understanding how this can apply from constant ice force inwards into a moulin in an elastic rather than viscous form, particularly since elastic deformation should be instantaneous with changing force but here it is from the change in resistance (the water), and I'm not convinced that they are equivalent. As far as I know, this type of calculation with both elastic and viscous deformation in a moulin or borehole is new to glaciology and so the approach needs more explanation / justification.

The Reviewer is correct that the elastic deformation is instantaneous and thus only evolves with a changing forcing -- on ice shelves and other bending-beam glaciologic applications this is tidal forcing; in the case of a moulin, it is continuous variations in water level that change the stress state. The Reviewer is mistaken, however, that the elastic deformation results “from constant ice force inwards”. The cryostatic stress (constant ice force inwards, Equation 6a) is indeed unchanging, but the counteracting hydrostatic stress (variable water force outwards, Equation 6b) varies by the minute (e.g. Figure 7a) and thus drives continuous elastic deformation (as well as viscous deformation).

Visco-elastic deformation of a borehole/moulin is indeed new in glaciology, but it has precedent and builds upon earlier glaciology work by Weertman (1971, 1973, 1996), as well as rock mechanics work (e.g., Amadei, 1983; Goodman, 1989; Priest, 1993; and especially Aadnøy, 1987) that study elastic deformation in wells drilled for exploration geology. Weertman, a solid-state physicist, applied dislocation-based fracture mechanics principles to vertically oriented geologic features that deform elastically: water-filled crevasses (downward propagating) and buoyant fluid-filled dikes in the mantle (upward propagating). This work earned him the IGS Seligman Crystal (1983). His equations for elastically driven crack propagation have since been applied to rapid drainage of supraglacial lakes (Krawczynski et al., 2009) and slower drainage of through-propagating hydrofractures (Poinar et al., 2017). The geometry of the crack-propagation problem, however, is Cartesian (2D in x and z), which differs from the cylindrical symmetry of a moulin or borehole (2D in r and z). For this reason, we drew on the rock mechanics literature (Aadnøy, 1987), where the geometry is cylindrical. We added clarifying sentences to Section 2.2.2.1 to describe the application from rock mechanics to glaciology.

In addition, we discuss “the role of elastic deformation in ice sheet hydrology” in Section 4.5, which we retitled accordingly. Based on our findings with the MouSh model, we suggest that the role of elastic deformation in hydrology models that resolve sub-daily variations should be reevaluated.

Part of the problem is that equation 4 is difficult to follow in its current form. If this is a new way to apply elasticity to a moulin then the equation needs to be fully derived in an appendix. If it has been applied in glaciology before you need citations. You base your equations from Aadnøy (1987), but this isn't even included in the reference list.

We see now that we described the elastic deformation component of MouSh too briefly in the manuscript. A detailed but relatively informal description of the derivation of Equation 4 for elastic deformation is currently available in our Github repository ([github.com/kpoinar/moulin-physical-model/releases](https://github.com/kpoinar/moulin-physical-model/releases)). We formalize this document as a chapter in a Supplement and reference it in Section 2.2.2.1. Finally, we have added Aadnøy (1987) to the References -- we regret the mistaken omission.

Both the elastic and viscous deformation rates that you plot are higher than I would have assumed for this situation. Previous analysis on borehole deformation has closure rates one or two orders of magnitude smaller (e.g. Paterson, 1977). Also Catania and Newmann (2010) argued closure would primarily occur in the base of the moulin and not the top 80%. A discussion on why yours are so much higher and/or examples of other systems that deform this rapidly would help.

Comparison and additional discussion of our deformation rates relative to previous results is a good idea. We now include a section in the discussion focusing on comparison with previous model and observational results (“Relative importance and magnitude of moulin deformation”).

The reason that moulin closure rates are much higher than closure rates in boreholes in the ice-sheet interior (Paterson, 1977) is simply water pressure: the moulin water level is nearly always below flotation (rough range 0.55-0.9 of overburden; Figures 4-5), whilst boreholes are generally kept filled to flotation with drilling fluid. This is the same reason that viscous closure rates are greatest near the water line (blue lines in Figure 6f): the inward cryostatic stress is least offset by the outward hydrostatic stress there.

Catania and Neumann (2010) actually model the closure of an air-filled moulin (see paragraph 10 of that paper). In this instance, there is no oppositional hydrostatic pressure; therefore, the rates of closure will be highest at the bed. We model moulins that contain water, which resists creep closure (Equation 6) and results in the highest creep closure rates to occur at the water level. In general, our creep closure rates are similar to those of Catania and Neumann (2010) near the surface, where our moulin is also air-filled, but lower near the bed, where our moulin is water-filled. A detailed comparison is now included in the new discussion section.

We know of no other vertically oriented glaciologic systems that are forced to deform as rapidly as hydraulically connected moulins. Furthermore, field observations of the sizes and deformation rates of moulins or boreholes are scarce. Measurements of moulin geometry are limited to the end of the melt season, when the absence of aggressive diurnal hydrologic forcing allows cavers to explore them with relative safety (Covington et al., 2020); this precludes observation of diurnal deformation rates.

2. Following on from this, where have you got your Maxwell times of 10-100 hours from? I believe the Maxwell time should be more in the range of a few hours. Therefore viscous deformation should be the primary application for moulin shape evolution. I’m also very unclear how you’re transitioning between elastic and viscous deformation with this model and applying the Maxwell time. It seems these are both being calculated separately but continuously given that you are plotting both over sub-hourly, multi-day timescales?

In the manuscript, we explain that “The Maxwell timescale is equal to  $(Y \times A \times \tau^2)^{-1}$ , or roughly 10–100 hours for typical Greenland ice” (Lines 115-116), which comes from the Turcotte & Schubert (2002) textbook (Section 7.10 Viscoelasticity, Equation 7.239, page 376) with adaptation to glacier viscosity  $1/(A \times \tau^{n-1})$  with  $n=3$ . (The Turcotte & Schubert formula has an additional factor of 2 that comes from the two shear stress terms in the expression for deviatoric stress in a 3D fluid; we dropped this inadvertently, but we model a 2D system, where deviatoric stress would have only one term, not two, so our expression is accurate.)

We obtained a numeric value for the Maxwell timescale using the values in Table 1: Young’s modulus  $Y \sim 1\text{--}9$  GPa, ice softness (flow law parameter)  $A \sim 5 \times 10^{-25}$  to  $5 \times 10^{-23}$  Pa<sup>3</sup>s<sup>-1</sup>, and typical shear stress  $\sim 10\text{--}100$  kPa. This gives 20,000– 200,000 seconds, or 6–56 hours. We rounded this to an order of magnitude, 10–100 hours.

A Maxwell model, or an elastic element (a spring) and a viscous element (a dashpot) in series), is the simplest form for a visco-elastic system, and a standard in geophysical modeling. A Maxwell model adds both components of deformation in a simultaneous and linearly independent way. This is consistent with the Reviewer’s description of calculating both components “separately but continuously”. We add an explanation of this at the end of the relevant paragraph in Section 2.2.2.

Vaughan (1995), in his well-known survey of tidal flexure on ice shelves, finds shear modulus  $\mu \sim 1$  GPa. Snow and firn cover these ice shelves; their lower value of shear moduli compared to ice likely biases these measurements low. For lake-driven hydrofractures in western Greenland, Krawczynski et al. (2009) used a range of  $\mu \sim 0.3\text{--}4$  GPa, reflecting pure ice (no firn cover). For subsurface hydrofractures in Southeast Greenland, Poinar et al. (2017) found a likely shear modulus  $\mu \sim 0.2\text{--}1.5$  GPa. Our sensitivity test values, Young’s modulus  $Y \sim 1\text{--}9$  GPa (or, equivalently, shear modulus  $\mu \sim 0.3\text{--}3.5$  GPa, using Poisson’s ratio  $\nu \sim 0.3\text{--}0.5$ ), are the full likely range for glacier ice. We add a paragraph to the Supplement to explain our choice of Young’s modulus values.

3. The treatment of turbulent melting and refreezing is confusing. Why only include refreezing outside of the melt season? Do you assume no refreezing overnight during the melt season? I see you say refreezing occurs only when water flow is laminar but it’s not clear to me that water flow will always be turbulent from the beginning to the end of the melt season. This needs more justification in the text by reporting the expected Reynolds numbers.

The refreezing module activates when water flow does not occur (a static water column) or when water flow is laminar (no heat is generated due to the dissipation of turbulent energy). These rules for refreezing use a calculated Reynold’s number to determine the flow regime throughout the moulin (laminar flow when  $Re < 2300$ ).

During the melt season, the meltwater supply to moulins, even during the evening, is substantial due to supraglacial basin size and hydraulics (e.g. Smith et al., 2017). All moulins we model have at least a modest flow in the early morning (time with the lowest flow, now included in Table 2).

These requirements and the parameters of our chosen representative model runs mean that refreezing is not activated, except near the end of the melt season. We now include the range of Reynolds numbers for the model runs in Tables 1 & 2. We also more clearly describe our thinking and choices in Section 2.2.3.1.

4. I understand why you’ve applied a simplified subglacial model given the complexity of the moulin model. However, both the description of the basal channel model and the application are confusing.

From what I can gather you're calculating channel characteristics at the moulin outlet (using ice pressure and moulin head pressure) but are applying a constant hydraulic potential gradient from the moulin to the terminus, so only producing one output point. The length scale calculations from moulin to terminus are not ideal in application to a continuously evolving channel (which will not be linear in terms of pressure) and are likely unrealistic. Instead why not apply a range of hydraulic potential gradients to test how those impact the moulin evolution? That would be much clearer to show how the pressure change at the bed impacts and is impacted by the moulin head.

The subglacial module uses the time-varying gradient between the water level in the moulin and atmospheric pressure at the terminus. Thus, the channel size and rate of change relevant to MouSh are at the midpoint between the moulin and terminus. These are the only two hydraulic heads that can be reasonably inferred without using a substantially more complex subglacial hydrology model that would shift emphasis away from the moulin and onto the subglacial system. However, we do more clearly describe the outputs from the subglacial model and how the moulin is connected in Section 2.2.4.2.

The Reviewer rightly points out that a sensitivity study of the effect of the hydraulic gradient would be relevant. During our sensitivity tests, the hydraulic gradient is varied as a result of differing ice thicknesses and distances from the terminus, albeit not in isolation (Figures 4o,p & 5o,p). We now include lines discussing the impact of the hydraulic gradient, including a fourth realistic model run, in Section 3.3 and the Supplement.

One of the significant concerns I have about the channel is the necessity of a large base flow. Looking at Figure 7 the base flow is the main driver for channel evolution and at an input rate of  $\sim 20 \text{ m}^3/\text{s}$  that's not surprising it's the primary control. To better determine the role of the changing moulin head it would be better to avoid adding additional time-varying water inputs at the bed since it's not clear that it's at all realistic. Instead, a static background water flux and/or a larger initial channel size could help with stability issues.

Indeed, the baseflow element required by the current setup of the subglacial model (a single channel connecting the moulin to the ocean) is non-ideal, but it emerges as a natural consequence of the simplicity of our subglacial model. The baseflow parameter represents all subglacial flow in the vicinity of the moulin (including all flow upstream and any nearby flow in adjacent branches of the dendritic network) except for its direct outflow, which is contained in the single-channel model. While  $20 \text{ m}^3/\text{s}$  baseflow does seem large compared to supraglacial inputs  $\sim 10 \text{ m}^3/\text{s}$  (Figure 7a), in the context that baseflow represents all accumulated inputs from all nearby moulins, it is more reasonable. However, we do acknowledge that the values are large. In order to mitigate these large values we have made several changes to the model initial conditions and characteristics (reflected in Figure and Table and textual changes throughout the text). We also perform a comparison of the impact of baseflow, with two new model runs, in the Supplement.

However, we choose to maintain the seasonal signal in the baseflow because the characteristics of the seasonal cycle are well known both from supraglacial and proglacial studies. We also note that our sensitivity study does not use a baseflow or background flux.

It's generally hard to believe the channel outputs that you present as it's not clear what the differences are between basins and experiments in terms of the hydraulic potential gradient, and because of that large base flow rate.

We make an effort to clarify the characteristics of the realistic basin characteristics, including hydraulic gradients, in Table 2 and in Section 2.4. We also made modifications to the baseflow (see previous comment and response).

However, as this paper focuses on the moulin model, so should the results and discussion. The role of a basal channel in this case is to present semi-realistic evolution characteristics to feedback with the moulin water levels. This does not give you much information about what is happening at the bed anywhere downstream of the moulin so that should not be widely discussed. Along these lines, before you begin your moulin model methods, you look at subglacial channel routing in section 2.1, which is misleading for the reader. This section does not seem relevant to this paper because of the highly simplified nature of the channel model that you apply and it would be better to start the paper with the moulin model methods.

We agree with the Reviewer. The primary purpose of this manuscript is to describe the model of moulin geometry and not discuss the subglacial system. We include discussion of the subglacial system in two locations within the manuscript. First, briefly in the description of model inputs, and finally in the discussion when we elaborate on the potential of coupling the MouSh model with a more complex subglacial model in order to eliminate the need for our parameterized base flow and what processes may be lumped in our simple tuning parameter. In this section, we emphasize the simplicity of the subglacial model and the benefits a more realistic subglacial model would provide. We do not attempt to interpret what may be going within the subglacial system downstream. The results and discussion *do largely* focus on the moulin, rather than the subglacial system.

In recognition of this comment, we've shortened the discussion Section 4.6. We have also entirely removed the small remote sensing component (Sections 2.1, 3.1, and parts of 4.1) in order to eliminate any confusion or implication of interpreting basal conditions. This removal results in textual modifications throughout the text.

5. The discussion at the moment focuses a lot on how moulins are formed, the subglacial system, and englacial void ratios. These don't seem directly relevant to your main findings from this complex model, which are the changes in shape, melt rate and deformation of the moulin. Particularly given that the subglacial model is much more simple and this is the first step in coupling to a more dynamic subglacial model, the discussion in this paper should be focused on the moulin evolution. There are many interesting outputs from your model runs that you could discuss in terms of the deformation of the ice possibly moving the input of the moulin at the bed along with stretching the length of the moulin; where in the moulin and at what time of the season water would be stored at higher or lower pressure influencing the subglacial system; the influence of the moulin shape on the head etc.

We thank the Reviewer for the three interesting ideas for new model experiments. We don't see a way to adapt these ideas as *Discussion* topics; rather, these new experiments would provide additional *Results*. We agree that they would likely be interesting, but they are outside the scope of the experiments we did perform, and thus would merit a different paper.

We will address the Reviewer's general criticism that our Discussion section extends too far from the direct results as follows:

- We will retitle Discussion Section 4.1 (currently "4.1 Formation mechanisms of moulins") to "4.1 Timescales of moulin formation and evolution", which we can directly comment on using the literature (formation timescale) and MouSh (evolution timescale). We also shorten this section (removing two of its four paragraphs) to sharpen its focus to the implications of our MouSh results.
- We defend Discussion Section 4.4, "Moulin geometry and the englacial void ratio", as it extends beyond our direct results while still being fundamentally grounded in them. This section cites multiple of our figures (Figures 4, 7, 8, 10) alongside current ideas in the literature, notably brought up by Flowers (2015). It puts our direct results, which as the Reviewer points out are "the changes in shape, melt rate and deformation of the moulin", into the context of an adjacent idea (the englacial void ratio). This is a natural extension to a related and current topic that is entirely appropriate for a discussion section.
- Discussion Section 4.6, "Potential coupled englacial – subglacial hydrology models", essentially addresses the main weakness in our model setup: the simplistic subglacial hydrology model we use. The Reviewer shares our awareness of this point, as evidenced throughout this review. To emphasize that this section is a critique of our own work, rather than an extension or a look toward the future, we will retitle it "Limitations of the current MouSh englacial – subglacial hydrology model".

## Line-by-line comments

11. where does that 10-14% number come from?

This section has been removed to focus the manuscript more clearly on moulin geometry.

12. they constitute most of the englacial system – what about englacial channels?

For our Greenland study, we treat "englacial channels" and "moulins" essentially as synonyms: near-vertical conduits to the bed. On other glaciers (especially, for instance, temperate debris-covered glaciers in the Himalaya), englacial channels formed by cut-and-closure can be quite sub-vertical (Gulley et al., 2009) and, as the Reviewer implies, can thus constitute a significant fraction of the englacial-subglacial drainage system. We address this in the shortened Section 4.1.

38-39. you already said this in your first sentence of the introduction.

Good point; we will remove this sentence.

71. what do you mean 'relative path length'? This whole paragraph is confusing because you're discussing basal hydraulic potential rather than moulins.



This section has been removed to focus the manuscript more clearly on moulin geometry.

84-95. I'm very confused. what do you mean by theoretical flow accumulation? Are you saying you're defining the catchments at the base of the ice? You're defining channel lengths at the bed? What is a subglacial channel node? Channels should join up dendritically towards the terminus in any case and are therefore linked rather than in separate segments.

This section has been removed to focus the manuscript more clearly on moulin geometry.

104. why do you initiate with a semi-circular, semi-elliptical shape? There doesn't seem to be any reason for this and it primarily serves to complicate your equations and your analysis.

The circular half of the moulin is the downstream end, where a simple circular geometry (radius  $r_1$ ) is an accurate description of the shape supplied by visco-elastic deformation. On the upstream half of the moulin, incision by the inflow stream and falling water greatly increases the radius of the moulin; hence, we describe this as an ellipse, with a long axis ( $r_2$ ) and a short axis ( $r_1$ ). We added an explanation for our initialization shape and a reference to Figure 2 in Section 2.1.1.

116. undefined parameters for Maxwell time. Where do you get the equation in parenthesis from?

We added parameter definitions and repeated the citation of the Turcotte & Schubert textbook in Section 2.2.2. See our response to the related Major Comment #2, above.

136. if moulins form by drainage into crevasses and hydrofracture why do you assume it's compressive?

While some moulins are associated with crevasse fields and persistent extension (e.g. Smith et al., 2015, Figure S2), moulins at moderate and high elevations are generally associated with supraglacial lake drainages (e.g. Figure 2; Poinar and Andrews 2021; Stevens et al., 2015; Hoffman et al., 2018). In these locations, ice is persistently compressive, except during a short period of extension during the initial formation. We include a reference to Poinar and Andrews (2021) to clarify this point.

146. you say viscous deformation is the dominant process over a 1 day timescale but you plot your viscous deformation on much smaller timescales showing diurnal variation.

Excellent point. We will remove this sentence.

154-156. specify here this opening and closure is relative to the pressure difference at depth – moulin should not open at all depths when above flotation – only in regions of the moulin where the relative pressure is higher than flotation. Looks like you're calculating this in the next section but this should be clarified here.

Good catch. It now reads: "When water is above flotation, the moulin will viscously open in regions where the hydrostatic pressure exceeds the cryostatic pressure."

160. why have both equation 5 and equation 6?

Good point, we now combine these equations.

189. laminar flow is when the Reynold's number is less than 2300.

This has been fixed here and discussed in a new Supplemental section.

193. do you mean all ice is at the melting point, not water?



No, we meant all water is 0°C (or, if at depth, it's at the pressure melting point). We changed our wording to "freezing point" to try to make this clearer.

206. what difference do you find with these alternative approaches?

Ultimately, we prefer using the first refreezing parameterization (Poinar et al., 2016). We removed reference to the second refreezing module.

210. you haven't told us about the equation you use for turbulent melt. I see that you have it later in the paragraph but it's confusing in this line because it implies we already know how you calculate it.

We rewrote this section to better reflect the previous section and to improve clarity.

226. but you do assume it's at the pressure melting temperature in your refreezing section. I'm getting confused.

Yes, see previous response (line 193). All water in the moulin is at the pressure melting point.

251. how modest?

Varying the friction factors across an order of magnitude does not affect the equilibrium or diurnal variation in water level; however, increasing friction factors by two orders of magnitude increases the equilibrium and diurnal variation in moulin water storage by about 10-20%. We now include this number and a reference to Figure 4.

266. what is S in equation 18? Again I thought the ice on the moulin wall was at the pressure melting point?

No, see previous response (line 193). We use measured ice temperatures for the ice surrounding the moulin; these can typically be -5°C to -15°C, depending on depth (Lüthi et al., 2015). We did test one scenario with moulin wall ice at 0°C, but more generally, MouSh allows ice temperature to vary.

S is the cross-sectional area of the subglacial channel. We now define the previously undefined variables following the equation.

318. presumably the unit hydrograph is to allow a lag for the runoff to reach the moulin? If so, you should state that.

We now include the sentence: "The use of a unit hydrograph parameterizes the impact of ice surface routing on the moulin input hydrograph."

322-329. this last paragraph seems more appropriate in the next section

Good point. We have made this change.

325. specify what you mean by englacial void ratio here? Why would that impact flow from upstream?

We clarify this sentence: "This englacial storage is often represented as an 'englacial void ratio' in current subglacial models."

332. what two elements?

Moulin and subglacial channel. We revised this sentence to read: "...that simulate flows between the moulin and subglacial channel"

339. assuming b is elevation above sea level, why include it if you have zero bed slope?

We include  $b$  for completeness and because the model has been developed to run with a non-zero bed slope. We now define  $b$ .

358. where is the base flow added?

We add base flow, in addition to discharge from the moulin, to the subglacial module. We add a clarifying sentence here.

359. you mentioned  $Q_{in}$  above in section 2.2.4.1, which included the baseflow. That's not being added directly into the moulin I assume? This should be clarified.

See response to the above comment.

371. You need a justification for your choice of enhancement factor. It seems like you're applying this factor between 1 and 9, but measurements by Luthi et al (2002) in Greenland ice suggested it can reach up to 2.5 in Holocene ice but is closer to 1 above that depth.

We choose an order of magnitude (1-9) to match the range of other rheological parameters (Young's modulus, ice column flow law parameter  $A$  via ice temperature scenario). We agree this is larger than  $E$  is likely to vary in the field. We have added a description of our reasoning here (Line 372).

398. what are these basins?

Yikes, yes, this is an awkward first mention of the basins, which we neglected to define. We now include a sub-section describing how we defined and delineated the test basins.

409. why are these lengths so different? I don't think these lengths scales help your model application – it makes it confusing (see comment at the beginning).

This section has been removed to focus the manuscript more clearly on moulin geometry.

419. how can they reach equilibrium with constantly changing water input and a constantly evolving basal channel? Or is this with a constant input?

Yes, the key word here is “near” equilibrium (or quasi-equilibrium). The forcing (water input) and the internal oscillation of the system (basal channel and head) continually vary, causing the moulin size to vary likewise. We have added a figure to the supplement that illustrates this ~3–5-day relaxation time alongside the continual evolution of moulin size. We replaced “near equilibrium” with “quasi equilibrium”, which is more accurate.

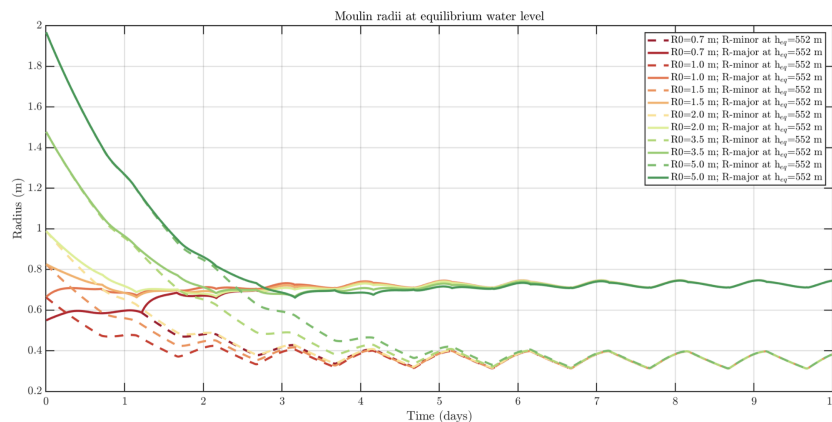

440-445. Changing Youngs modulus for elastic expansion increased moulin volume by 38% and capacity by 56%? This seems like a much more significant change than I would assume from elastic deformation in this context.

Yes, it was larger than we expected, too. We studied it closely and devoted an entire Discussion section to it (Section 4.5, “The role of elastic deformation in moulin geometry”). Ultimately, its effects are comparable to viscous deformation (which we also varied by an order of magnitude, via the enhancement factor  $E$ ), which showed a 20–40% change in moulin geometry factors. These are comparable to the 38–56% changes sourced elastically, cited above.

461. it would be more appropriate here to say the outflow is sensitive to the steepness of the basal pressure gradient.

We do agree that the outflow is set by the hydraulic gradient, but in turn the hydraulic gradient is set by the distance from the terminus ( $L$ ) and the ice thickness ( $H$ ), as we’ve written, because ice thickness sets the rate of subglacial creep closure and is a ceiling for moulin water level. The basal ice softness ( $A_{\text{basal}}$ ) also plays a key role in channel size and thus outflow -- high  $H$  and low  $A_{\text{basal}}$  allow for higher moulin water levels and thus a steeper hydraulic gradient to the terminus. To incorporate this comment, we have included the line: “This sensitivity indicates an interplay among these model parameters, the subglacial hydraulic gradient, and moulin water level.”

Line 474?. but the increase in water level should increase the pressure gradient and cause faster flow through the subglacial channel and melt opening?

We think we have this line number correct. If so, we refer the Reviewer to the previous comment.

Line 486?. this discussion and Figure 6 show a diurnal change in viscous deformation by up to 20cm and 10cm elastically. Then the diurnal phase change up to 30cm/day. Is that saying you melt up to an extra 30cm a day? And that the moulin diameter pulses in and out every day due to melt countered by viscous and elastic deformation? Is there any evidence for this from moulin measurements.

Unfortunately, we were unable to identify to which line the Reviewer is referring, but we believe that this comment refers to Section 3.2.2. Figure 6f plots the cumulative change for viscous deformation, elastic deformation, and melting. While we do calculate values of between 20-30 cm per day near the water line, when combined, the actual daily change in moulin diameter is smaller because the moulin is in quasi-equilibrium. For clarity, we now include the combined change in moulin shape in Figure 6g.

Yes, the Reviewer correctly states our results. Unfortunately, measurements of moulin geometry are not available until the end of the melt season, when the absence of aggressive diurnal hydrologic forcing allows cavers to explore them with relative safety (Covington et al., 2020). This precludes observation of diurnal deformation rates.

516. what would cause a moulin to change radius diurnally more in thicker vs. thinner ice?

This is the internal dynamics of the subglacial model (Schoof, 2010): daily water pressure fluctuations are greater in thicker ice. This is likely due to the nonlinearity in subglacial creep closure ( $\sim H^3$ ) alongside linear channel opening by melt. The moulin water level drives visco-elastic opening and closure of the moulin, causing higher diurnal variability in moulin size in thick ice. We now add a sentence to this effect.

Line 535-536?. the similarity between Basin 1 and 2 is likely because the basal channel model is driven by a similarly large background influx rather than by the changing conditions of the moulin itself.

Despite similarity in supraglacial and baseflow inputs between Basin 1 & 2 (Figure 7a), there are clear differences in moulin water level and capacity. These differences are elucidated in Figure 7 and in the paragraph starting on line 530. So, some other driver (not water inputs) explains the differences in moulin capacity; this leaves ice thickness or basal hydraulic gradient. We remove the ending phrase of the sentence starting on line 535 to address this.

526. how could thick ice viscously close channels if water is above overburden pressure?

In Basins 1-2 (thinner ice,  $H < 750$  m), water rarely exceeds the overburden pressure (Figure 7b). In Basin 3 (thicker ice,  $H > 1300$  m), as the Reviewer points out, the pressure exceeds overburden for a number of hours each day. These hours without visco-elastic closure should overall increase the mean channel size, compared to a moulin that did not overflow daily (e.g., one that had higher base flow). We now add this caveat to the discussion -- that closure rates in Basin 3 are retarded by the high daily water pressures.

Line ???. specify which system sees the increase.

The line number that this refers to was garbled by the Reviewer's text editor. We were able to reconstruct line numbers for most comments, but not this one. Unfortunately, we cannot make the suggested change without knowing which part of the text the comment refers to.

Line ???. you have elastic processes in the channel too? Any references to show this is justified in basal channels?

No, we do not have elastic deformation in the subglacial channel model. See the last paragraph in Discussion Section 4.5, for a discussion on how inclusion of elastic processes in subglacial channel models would likely affect subglacial model output in general.

573. I'm unsure why you're discussing initial moulin formation processes which aren't the focus of your study. Moulin evolution, yes, and you have plenty of interesting things to talk about on that subject.

See our response to an earlier, more general comment: We will retitile Discussion Section 4.1 (currently "4.1 Formation mechanisms of moulins") to "4.1 Timescales of moulin formation and evolution", which we can directly comment on using the literature (formation timescale) and MouSh (evolution timescale). We will also shorten this section (removing two of its four paragraphs) to sharpen its focus to the implications of our MouSh results.

640. exploration would be good to validate your model so I wouldn't discount it.

We agree that exploration in general would have utility. We now soften the language here regarding the relative value of underwater versus sub-aerial exploration.

645. can you clarify this sentence. You are saying field measurements show 103-112% of overburden, or 3-12% of overburden? The former seems more likely. But 20% above overburden? That should be on the surface?

It's the latter, but I see how our sentence is misleading. It's important to note that the mean daily water pressure in a moulin is generally *much* lower than overburden (<70% of overburden in Greenland observations to date), so even these larger fluctuations (25%) will not overflow a moulin. Observed diurnal water level fluctuation at one of the Covington et al. (2020) moulins was quite small: 3% of the ~640 m overburden, or just 20 m daily variation around a daily mean water level of ~460 m (~65% of overburden). At the Andrews et al. (2014) moulins, daily variations approached 25% of overburden, but the daily mean water level was ~70% of overburden (~500 m in ice thickness 720 m), meaning that the moulin water level rarely exceeded overburden, and never overflowed. We now add text to remind the reader that the mean daily water level is actually quite low (<70% of overburden), not near flotation as some might assume.

646. some boreholes hit more efficient systems, as explored by Meirbachtol et al (2013).

This is true, which is why we use the phrase 'generally thought'. In Greenland, there are some instances of connecting to an efficient system with a borehole, but most connect to the inefficient system, including some described in Meierbachtol et al. (2013).

656. rephrase 'variations in diurnal water level variability'

Yup, that's awkward. We will remove the word 'variability'.

669. I don't think an englacial void ratio is used to resolve diurnal basal pressure. How would you get a spatially variable englacial void ratio? What has this got to do with moulins?

The englacial void ratio is in fact introduced for this purpose. All current models use a fixed (not spatially variable) value for englacial void ratio that is tuned to an order of magnitude that works (allows the model to accurately reproduce basal water pressure observations). We include a reference to Flowers & Clarke (2002) for clarity.

Line ?? you said earlier in the paper that moulins are used as source inputs for models. How does this link to englacial void ratio? The change in water level in a moulin because of increase/decrease in diameter will impact the water supply to the base via the pressure. Perhaps you mean a storage parameter in models? I certainly think it's worth coupling with subglacial hydrology, but I'm not sure this paragraph makes sense. Line 696 covers this possibility and is an important point to make.

We hypothesize that (in the real world) moulins can both be source inputs and storage features. In current subglacial models, they serve only as source inputs; we posit that moulins can also subsume the englacial void ratio / bulk storage parameters commonly used in subglacial models. We rewrite the sentence starting on line 668 to clarify how the englacial void ratio works in subglacial models. We also tweak the language in the following paragraph to better describe how including moulins with variable geometry could reduce subglacial model dependence on the englacial void ratio, which is the primary short-term storage parameter in subglacial models.

700. what do you mean a static shape instead of static cylinder? The Trunz et al, in review paper is mentioned a lot which is frustrating since we don't have access to see what it discusses.

Here we mean an arbitrary shape that doesn't change, versus a cylinder shape that doesn't change. We now add the word "arbitrary" for clarity.

731-739. see my above comments about elastic deformation. You need more justification for these statements given that it hasn't been included in subglacial models to date.

See our above response. Our justification for suggesting inclusion of elastic deformation is found on lines 730-731: in a water-filled moulin, it is comparable in size to viscous deformation.

742. are you sure it's not that subglacial channels form where there are moulin inputs?

This is likely a chicken or egg problem (see, for a similar example, Sergienko, 2013). However, we removed the remote sensing part of the manuscript, including Figure 3, so this sentence has been removed.

Line ?? . rephrase this sentence.

We were unable to reconstruct line numbers for this comment. Unfortunately, we cannot make the suggested change without knowing which part of the text the comment refers to.

## Figures

Figures 4 and 5. Why does the y axis of the diurnal range go up to 0.4 if values don't go above 0.2?

Currently, the y-axis range in Figure 4 leaves room for the panel numbers. However, we do decrease the y-axis range slightly in Figure 5. In Figure 5, the values go up to 0.21 and room is needed for the panel letters, so the adjustment reflects that.

Figure 6. I'm intrigued by the shapes in f. Why is there more turbulent melting in the middle of the borehole? What are the factors contributing to the differences between elastic and viscous deformation shapes and rates? In g since it seems to have reached equilibrium within a day or so it would be useful to zoom in so we can see the lines better.

We now add panel h, which shows a zoom (Day 9-10) of panel g. We also now add a black line to panel f that shows the total mean daily deformation (viscous + elastic + phase), as mentioned in an earlier comment.

Figure 7. In your thickest ice example for moulin water level, it looks like your moulin is overflowing. Also in d) where is the 741m example? The channel size looks almost entirely dictated by the background flow you input with small diurnal variability on top.

The Basin 3 moulin does overtop due to the ice overburden pressure -- decreasing the base flow results in even more persistent overtopping. This is mentioned in Section 3.3 and again in 3.4. We now also indicate this in the caption. In panel d, the 741 m moulin (purple) is hidden behind the 533 m moulin (black). We also clarify this in the legend.

Figure 8. This is a really interesting figure. Why not discuss the shape changes (particularly due to Glen's Flow law) more in the manuscript?

The bow shape from Glen's Flow Law has no effect on moulin volume (water storage) or water level. We find no importance to it, but we include it in the model for completeness: this is the true *shape* of a moulin, even if it has no effect on the dynamic behavior.

Figure 9 b. What happened around day 32?

During this period, the minimum daily supraglacial inputs are quite high (Figure 7a), this in turn results in water levels staying around flotation (Figure 7b). In this case, viscous deformation hovers around zero (though causing moulin opening), resulting in a high ratio of ecstatic to viscous deformation and a high ratio of phase change to viscous deformation (purple line in Figure 9b). There is an associated growth in moulin capacity (Figure 7c) Ultimately, this is a response to multiple days where melt inputs do not exhibit substantial diurnal variability.

## References (review + response from authors)

- Aadnøy, B. S.: Stresses around horizontal boreholes drilled in sedimentary rocks, *Journal of Petroleum Science and Engineering*, 2, 349–360, [https://doi.org/10.1016/0920-4105\(89\)90009-0](https://doi.org/10.1016/0920-4105(89)90009-0), 1989.
- Amadei, B.: *Rock Anisotropy and the Theory of Stress Measurements*, Springer-Verlag, Berlin, New York, 1983.
- Andrews, L. C., Catania, G. A., Hoffman, M. J., Gulley, J. D., Lüthi, M. P., Ryser, C., Hawley, R. L., and Neumann, T. A.: Direct observations of evolving subglacial drainage beneath the Greenland Ice Sheet, *Nature*, 514, 80–83, <https://doi.org/10.1038/nature13796>, 2014.
- Catania, G. A. and Neumann, T. A.: Persistent englacial drainage features in the Greenland Ice Sheet, *Geophysical Research Letters*, 37, L02501, <https://doi.org/10.1029/2009GL041108>, 2010.
- Covington, M. D., Gulley, J. D., Trunz, C., Mejia, J., and Gadd, W.: Moulin Volumes Regulate Subglacial Water Pressure on the Greenland Ice Sheet, *Geophysical Research Letters*, 47, e2020GL088901, <https://doi.org/10.1029/2020GL088901>, 2020.
- Flowers, G. E.: Modelling water flow under glaciers and ice sheets, *Proceedings of the Royal Society A*, 471, 20140907–20140907, <https://doi.org/10.1098/rspa.2014.0907>, 2015.
- Flowers, G. E. and Clarke, G. K. C.: A multicomponent coupled model of glacier hydrology 1. Theory and synthetic examples, *Journal of Geophysical Research*, 107, 2287, <https://doi.org/10.1029/2001JB001122>, 2002.
- Goodman, R. E.: *Introduction to Rock Mechanics*, 2nd ed., Wiley, New York, 1989.
- Gulley, J. D., Benn, D. I., Screatton, E., and Martin, J.: Mechanisms of englacial conduit formation and their implications for subglacial recharge, *Quaternary Science Reviews*, 28, 1984–1999, <https://doi.org/10.1016/j.quascirev.2009.04.002>, 2009.
- Hoffman, M. J., Perego, M., Andrews, L. C., Price, S. F., Neumann, T. A., Johnson, J. V., Catania, G., and Lüthi, M. P.: Widespread Moulin Formation During Supraglacial Lake Drainages in Greenland, *Geophysical Research Letters*, <https://doi.org/10.1002/2017GL075659>, 2018.
- Krawczynski, M. J., Behn, M. D., Das, S. B., and Joughin, I.: Constraints on the lake volume required for hydro-fracture through ice sheets, *Geophysical Research Letters*, 36, L10501, <https://doi.org/10.1029/2008GL036765>, 2009.



Lüthi, M. P., Funk, M., Iken, A., Gogineni, S., and Truffer, M.: Mechanisms of fast flow in Jakobshavn Isbrae, West Greenland: Part III. Measurements of ice deformation, temperature and cross-borehole conductivity in boreholes to the bedrock, *Journal of Glaciology*, 48, 369–385, <https://doi.org/10.3189/172756502781831322>, 2002.

Meierbachtol, T. W., Harper, J., and Humphrey, N.: Basal Drainage System Response to Increasing Surface Melt on the Greenland Ice Sheet, *Science*, 341, 777–779, <https://doi.org/10.1126/science.1235905>, 2013.

Paterson, W. S. B.: Secondary and tertiary creep of glacier ice as measured by borehole closure rates, *Reviews of Geophysics*, 15, 47–55, <https://doi.org/10.1029/RG015i001p00047>, 1977.

Poinar, K. and Andrews, L. C.: Challenges in predicting Greenland supraglacial lake drainages at the regional scale, *The Cryosphere*, 15, 1455–1483, <https://doi.org/10.5194/tc-15-1455-2021>, 2021.

Poinar, K., Joughin, I., Lenaerts, J. T. M., and Broeke, M. R. V. D.: Englacial latent-heat transfer has limited influence on seaward ice flux in western Greenland, *Journal of Glaciology*, 1–16, <https://doi.org/10.1017/jog.2016.103>, 2016.

Poinar, K., Joughin, I., Lilien, D., Brucker, L., Kehrl, L., and Nowicki, S.: Drainage of Southeast Greenland Firn Aquifer Water through Crevasses to the Bed, *Frontiers in Earth Science*, 5, <https://doi.org/10.3389/feart.2017.00005>, 2017.

Priest, S. D.: *Discontinuity Analysis for Rock Engineering*, 1st ed., Chapman & Hall, London; New York, 1993.

Schoof, C.: Ice-sheet acceleration driven by melt supply variability, *Nature*, 468, 803–806, <https://doi.org/10.1038/nature09618>, 2010.

Sergienko, O. V.: Glaciological twins: basally controlled subglacial and supraglacial lakes, *Journal of Glaciology*, 59, 3–8, <https://doi.org/10.3189/2013JoG12J040>, 2013.

Smith, L. C., Chu, V. W., Yang, K., Gleason, C. J., Pitcher, L. H., Rennermalm, A. K., Legleiter, C. J., Behar, A. E., Overstreet, B. T., Moustafa, S. E., Tedesco, M., Forster, R. R., LeWinter, A. L., Finnegan, D. C., Sheng, Y., and Balog, J.: Efficient meltwater drainage through supraglacial streams and rivers on the southwest Greenland ice sheet, *PNAS*, 112, 1001–1006, <https://doi.org/10.1073/pnas.1413024112>, 2015.

Stevens, L. A., Behn, M. D., McGuire, J. J., Das, S. B., Joughin, I., Herring, T., Shean, D. E., and King, M. A.: Greenland supraglacial lake drainages triggered by hydrologically induced basal slip, *Nature*, 522, 73–76, <https://doi.org/10.1038/nature14480>, 2015.

Turcotte, D. L. and Schubert, G.: *Geodynamics*, Cambridge University Press, 484 pp., 2002.

Vaughan, D. G.: Tidal flexure at ice shelf margins, *Journal of Geophysical Research*, 100, 6213–6224, <https://doi.org/10.1029/94JB02467>, 1995.

Weertman, J.: Theory of Water-Filled Crevasses in Glaciers Applied to Vertical Magma Transport beneath Oceanic Ridges, *Journal of Geophysical Research* 76(5), 1171–1183, 1971.

Weertman, J.: Can a water-filled crevasse reach the bottom surface of a glacier? *IASH Publications*, 95, 139–145, 1973.

Weertman, J.: Dislocation based fracture mechanics, *World Scientific*, London, 1996.
